# Supplementary material for: Synthesis, characterization, and biodistribution of multiple 89Zr-labeled pore-expanded mesoporous silica nanoparticles for PET
Source: Royal Society of Chemistry journal article supplement (doi:10.1039/c3nr06800e), 2014-01-01
Supplement: c3nr06800e1.pdf [file c3nr06800e1.pdf]

## Supporting Information

### Synthesis, characterization, and biodistribution of multiple $^{89}\text{Zr}$ -labeled pore-expanded mesoporous silica nanoparticles for PET

Larissa Miller,<sup>1</sup> Gordon Winter,<sup>2</sup> Benjamin Baur,<sup>2</sup> Barbara Witulla,<sup>2</sup> Christoph Solbach,<sup>2</sup> Sven Reske,<sup>2,\*</sup> Mika Lindén<sup>1,\*</sup>

<sup>1</sup> Department of Inorganic Chemistry II, University Ulm, Albert-Einstein-Allee 11, D-89081 Ulm, Germany

<sup>2</sup> Clinic for Nuclear Medicine, University Ulm, Albert-Einstein-Allee 23, D-89081 Ulm, Germany

Corresponding author e-mail addresses: mlinden@uni-ulm.de, sven.reske@uniklinik-ulm.de

**Table S1.** C,H,N,S-analysis for hydrothermally treated MSNs at different stages of the functionalization process.

|                     | C [%] | H [%] | N [%] | S [%] |
|---------------------|-------|-------|-------|-------|
| pore-expanded MSN   | 1.8   | 1.1   | -     | -     |
| amino-funct. MSN    | 6.8   | 2.1   | 2.1   | -     |
| max. DFO loaded MSN | 15.9  | 3.2   | 4.1   | 4.5   |

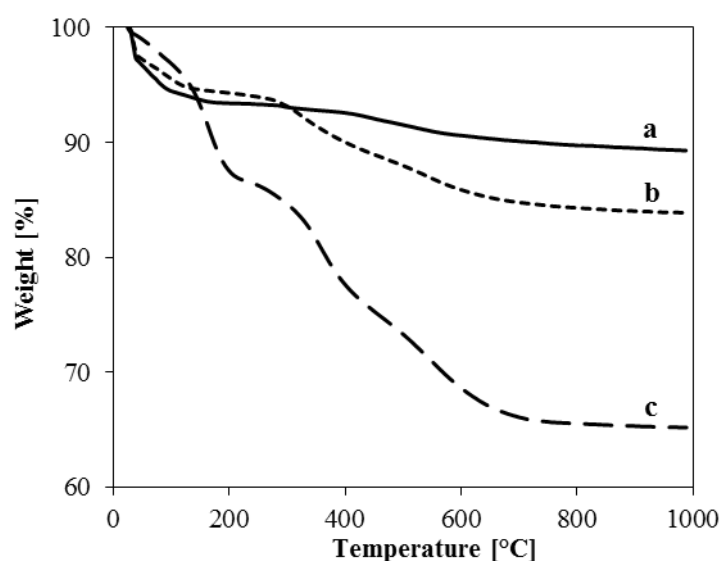

**Figure S1.** Thermogravimetric analysis of (a) pore-expanded, (b) amino-functionalized and (c) max. DFO loaded MSNs.

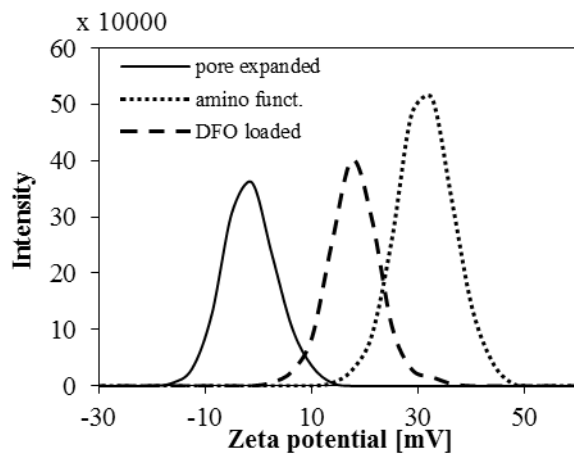

**Figure S2.** Zeta-potential measurements of the samples in Table S1.

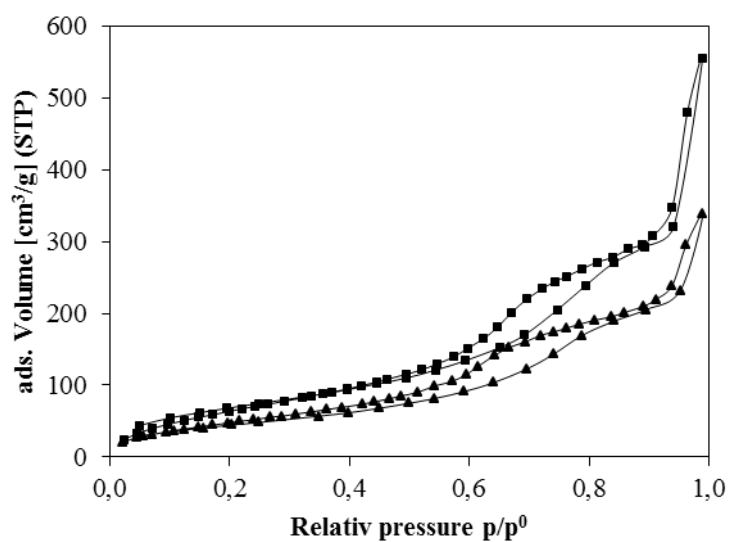

**Figure S3.** N<sub>2</sub> adsorption-desorption isotherms of non-loaded MSN (■) and DFO loaded MSN (▲) samples.

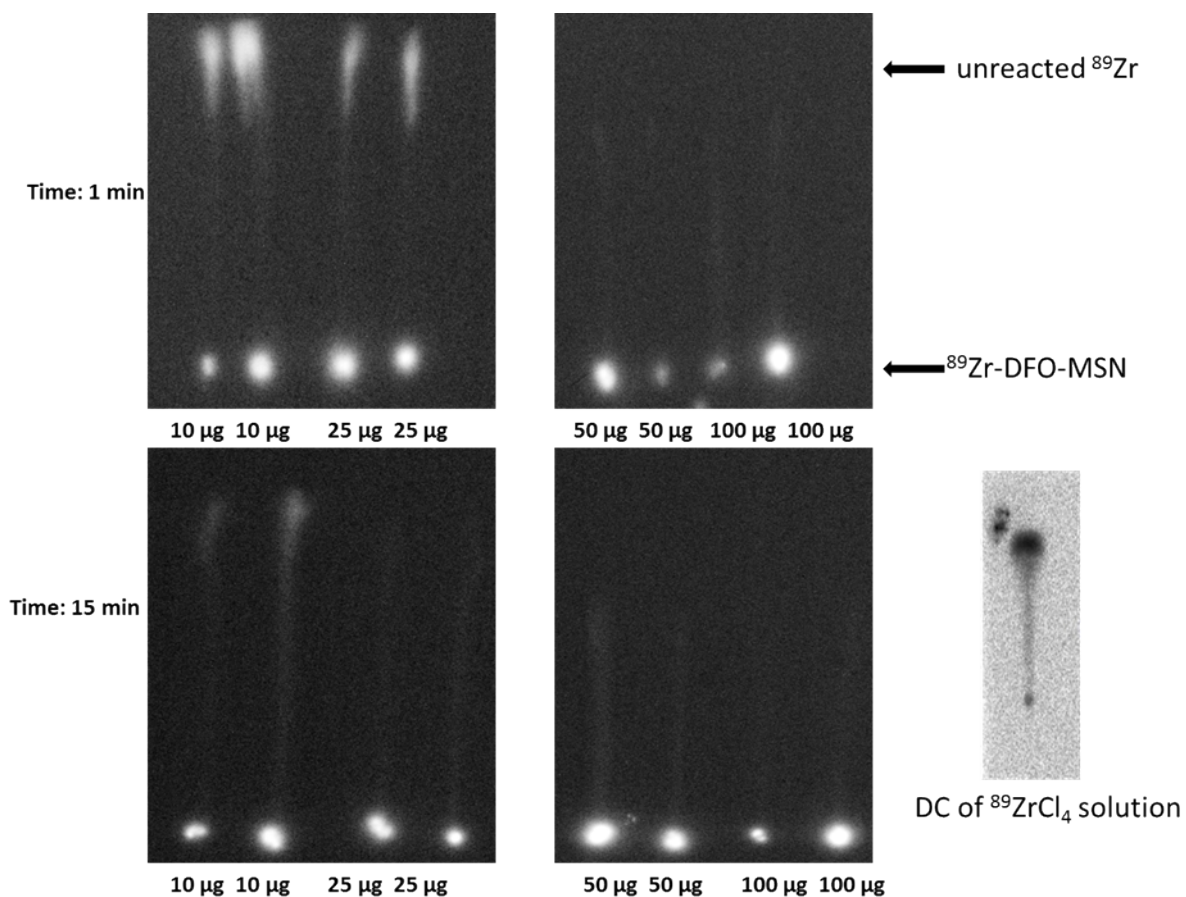

**Figure S4.** Thin layer chromatography of  $^{89}\text{Zr}$ -DFO-MSN for studying the dependence between concentration of MSNs and RCY.

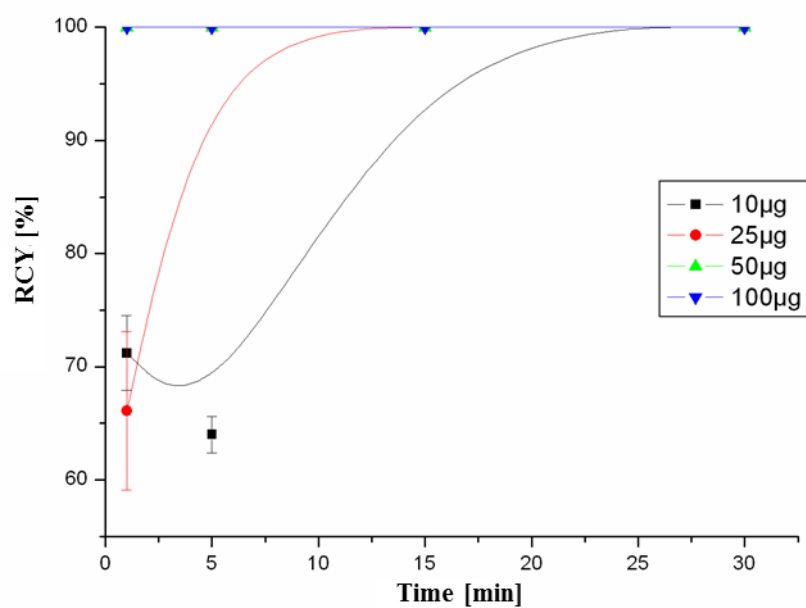

**Figure S5.** Quantitative analysis of RCY dependency on particle amount over time.

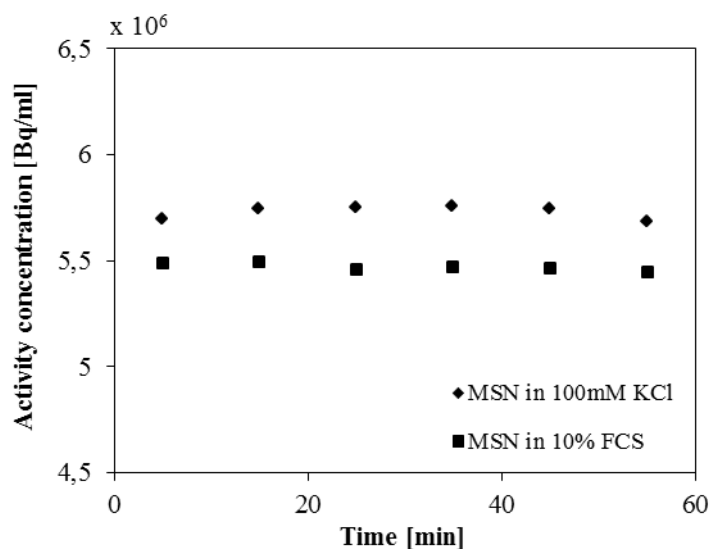

**Figure S6.** Radioactivity of <sup>89</sup>Zr-DFO-MSN dispersed in 100 mM KCl solution and cell culture media with 10 % FCS over time.

**Table S2.** Uptake of free <sup>89</sup>Zr and <sup>89</sup>Zr-DFO-MSN in major organs 1 h after intravenous injection.

|                       | Blood<br>(%ID/g)  | Heart<br>(%ID/g)              | Brain<br>(%ID/g)             | Lung<br>(%ID/g)                  | Liver<br>(%ID/g) |
|-----------------------|-------------------|-------------------------------|------------------------------|----------------------------------|------------------|
| <sup>89</sup> Zr-MSN  | 0.1 ± 0.0         | 0.4 ± 0.1                     | 0.1 ± 0.0                    | 13.2 ± 2.5                       | 49.3 ± 1.2       |
| free <sup>89</sup> Zr | 59.2              | 16.9                          | 1.7                          | 21.4                             | 10.9             |
|                       | Spleen<br>(%ID/g) | Kidney<br>(%ID/g)             | Colon<br>(%ID/g)             | Muscle<br>(%ID/g)                | Tail<br>(%ID/g)  |
| <sup>89</sup> Zr-MSN  | 45.4 ± 11.8       | 2.7 ± 0.9                     | 0.1 ± 0.0                    | 0.1 ± 0.0                        | 7.6 ± 0.8        |
| free <sup>89</sup> Zr | 14.6              | 13.2                          | 11.4                         | 1.7                              | 21.2             |
|                       | Bone<br>(%ID/g)   | Small<br>intestine<br>(%ID/g) | Salivary<br>gland<br>(%ID/g) | LNCap<br>(C4-2) tumor<br>(%ID/g) |                  |
| <sup>89</sup> Zr-MSN  | 0.8 ± 0.2         | 0.1 ± 0.0                     | 0.1 ± 0.0                    | 0.3 ± 0.1                        |                  |
| free <sup>89</sup> Zr | 14.4              | 7.9                           | 12.4                         | 13.9                             |                  |
